# Supplementary material for: A simple strategy to enhance electrical conductivity of nanotube-conjugate polymer composites via iodine-doping
Source: Royal Society of Chemistry journal article supplement (doi:10.1039/c5ra15107d), 2015-01-01
Supplement: c5ra15107d1.pdf [file c5ra15107d1.pdf]

# **A simple strategy to enhance electrical conductivity of nanotubes-conjugate polymer composites via iodine-doping**

**Lina Fan and Xuecheng Xu\***

Department of physics, East China Normal University, No.500 Dong Chuan Road, 200241 Shanghai, China. E-mail:  
xcxu@phy.ecnu.edu.cn

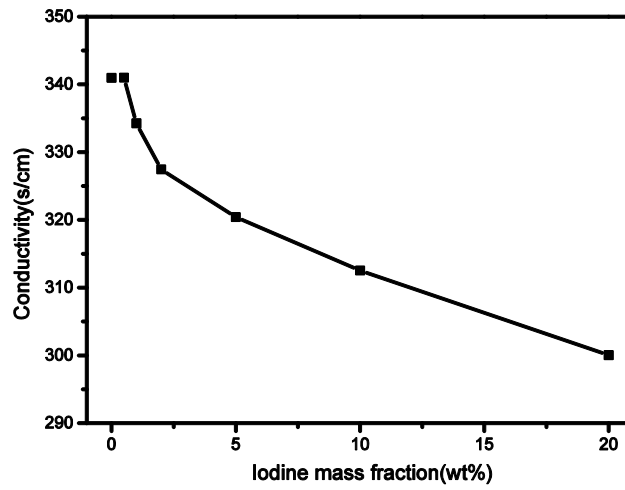

Figure S1. The conductivity of iodine-doped CNTs with the increasing mass fraction of iodine

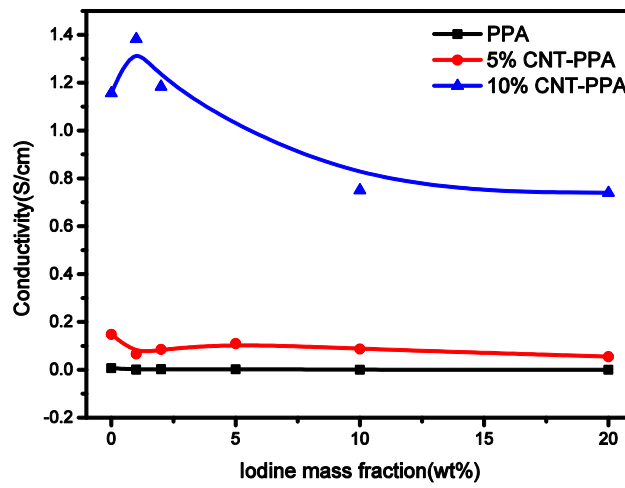

Figure S2. The conductivity of iodine-doped CNT-PPA composites
